# Supplementary material
Source: Research Square preprint supplement (doi:10.21203/rs.3.rs-6779286/v1)
Supplement: Supplementary file 1 [file ebe9360a984c537186349239.docx]

| Supplementary Table 1. Five-year changes in nighttime sleep, napping, and circadian RAR parameters | | | |
| --- | --- | --- | --- |
| Parameter | **Mean (SD) change** | **“Worsening” cutoff** | **No. (%)**  **“worsening”** |
| Nighttime sleep duration* (min) | 19.0 (74.1) | 93.0†; -55.1‡ | 103 (14.5)†; 95 (13.5)‡ |
| Sleep efficiency (%) | 1.0 (10.7) | -9.7 | 72 (10.2) |
| Wake after sleep onset (min) | 5.6 (45.4) | 51.0 | 75 (10.7) |
| Napping duration (min) | 33.2 (83.9) | 117.1 | 85 (12.1) |
| Napping frequency (count) | 1.8 (4.3) | 6.0 | 91 (12.9) |
| Acrophase§ (portions of hours) | -0.07 (1.1) | -1.1 | 73 (10.4) |
| Amplitude (counts/min) | -685.2 (1080.5) | -1765.6 | 86 (12.2) |
| Mesor (counts/min) | -290.0 (561.8) | -851.8 | 81 (11.5) |
| Robustness (pseudo-F) | -195.0 (427.3) | -622.3 | 98 (13.9) |
| Note: The mean (SD) changes and the “worsening” cutoffs (one SD worse than the mean change) presented in this table were calculated in the sample of individuals with actigraphic data at both baseline and follow-up, before exclusion of women with incomplete actigraphic data or without post-visit nine mortality information.  *For nighttime sleep duration, rather than “worsening” and “stable/improving,” the sample was split into “increasing,” “decreasing,” and “stable.”  † “Increasing” group of nighttime sleep duration  ‡ “Decreasing” group of nighttime sleep duration  § For acrophase, rather than “worsening” and “stable/improving,” the sample was split into “earlier” and “stable/later.”  Abbreviations: RAR, rest-activity rhythms; SD, standard deviation. | | | |

| Supplementary Table 2. Visit nine (second sleep visit) nighttime sleep, napping, and circadian rest-activity rhythm parameters by profiles of sleep-wake change | | | | |
| --- | --- | --- | --- | --- |
| Parameter | **Stable sleep**  **(N=307)** | **Declining Nighttime Sleep**  **(N=251)** | **Increasing**  **Sleepiness**  **(N=146)** | **P** |
| Nighttime sleep duration (min) | 433.0 (81.7) | 401.4 (89.3) | 464.8 (88.0) | **<.001** |
| Sleep efficiency (%) | 84.9 (10.1) | 78.1 (15.6) | 87.7 (7.4) | **<.001** |
| Wake after sleep onset (min) | 52.5 (42.6) | 84.2 (75.0) | 47.2 (36.2) | **<.001** |
| Napping duration (min) | 48.5 (63.3) | 71.8 (104.0) | 175.5 (138.1) | **<.001** |
| Napping frequency (count) | 2.7 (3.5) | 4.0 (5.0) | 9.4 (8.2) | **<.001** |
| Acrophase (portions of hours) | 14.7 (1.3) | 14.7 (1.4) | 14.6 (1.6) | .68 |
| Amplitude (counts/min) | 3337.9 (1283.7) | 2883.7 (1110.4) | 1901.6 (1127.8) | **<.001** |
| Mesor (counts/min) | 2035.1 (588.3) | 1928.4 (556.9) | 1285.7 (659.7) | **<.001** |
| Robustness (pseudo-F) | 863.1 (535.0) | 612.3 (424.5) | 462.4 (347.6) | **<.001** |
| Note: Medians and interquartile ranges (IQRs) are reported. Kruskal-Wallis tests were used. | | | | |

| Supplementary Table 3. Visit nine characteristics by post-visit nine mortality status | | | |
| --- | --- | --- | --- |
|  | **Did not die (N=614)** | **Died (N=90)** | **P** |
| Age | 87.0 (3.0) | 88.0 (4.0) | .09 |
| <12 years education | 100 (16.3) | 11 (12.2) | .40 |
| Walks for exercise | 255 (41.5) | 27 (30.0) | **.03** |
| Body mass index (kg/m2) | 25.8 (6.1) | 23.8 (7.3) | **.02** |
| Diabetes | 80 (13.0) | 19 (21.1) | .06 |
| Hypertension | 403 (65.6) | 59 (65.6) | >.99 |
| Stroke | 65 (10.6) | 14 (15.6) | .22 |
| Myocardial infarction | 98 (16.0) | 23 (25.6) | **.04** |
| Depression | 69 (11.2) | 14 (15.6) | .26 |
| 3MS score (0-100) | 91.0 (10.0) | 88.5 (10.0) | **.01** |
| Impairment of ≥1 IADL | 399 (65.0) | 67 (74.4) | .08 |
| Good/excellent self-rated health | 494 (80.6) | 62 (68.9) | **.01** |
| Antidepressant user | 85 (13.8) | 22 (24.4) | **.01** |
| Sleep medication user | 137 (22.3) | 18 (20.0) | .75 |
| Note: For age, body mass index, and 3MS score, Kruskal-Wallis tests were used, and median and interquartile range are reported. Counts and percentages are reported for all other variables (categorical variables), for which chi-square tests (and Fisher’s exact test for self-rated health) were used. The following variables were missing observations: age (5), walks for exercise (17), body mass index (45), depression (6), impairment of ≥1 IADL (5), self-rated health (1), antidepressant user (3), and sleep medication user (2).  Abbreviations: 3MS, Modified Mini-Mental State Examination; IADL, Instrumental Activity of Daily Living. | | | |

**Supplementary** **Figure 1. Derivation of the study sample from the Study of Osteoporotic Fractures.**

V8: Baseline sleep visit; V9: Second sleep visit

**Supplementary Figure 2. Loadings of the nine sleep-wake parameter changes on the top six principal components (PCs).** These six PCs, which explained over 95% of cumulative variance (95.8%), were selected to be used in the clustering analysis.

Abbreviations: PC, principal component; WASO, wake after sleep onset; RAR, rest-activity rhythm.

**Supplementary** **Figure 3. Unadjusted Kaplan-Meier all-cause mortality survival curves for individual sleep-wake parameter changes.** HRs and 95% 95% CIs were calculated using unadjusted Cox proportional hazards models. Time is measured in days since visit nine. Censored participants are represented by vertical markings along the survival curves. For each parameter, the “worsening” group (“earlier” for acrophase and “decreasing” for nighttime sleep duration) was defined as >1 standard deviation worse (earlier for acrophase and below for nighttime sleep duration) than the mean change. For nighttime sleep duration, the “increasing” group was defined as >1 standard deviation above the mean change.

Abbreviations: HR, hazard ratio; CI, confidence interval.

**Supplementary Figure 4. Unadjusted Kaplan-Meier cardiovascular mortality survival curves for individual sleep-wake parameter changes.** HRs and 95% CIs were calculated using unadjusted Cox proportional hazards models. Time is measured in days since visit nine. Censored participants are represented by vertical markings along the survival curves. For each parameter, the “worsening” group (“earlier” for acrophase and “decreasing” for nighttime sleep duration) was defined as >1 standard deviation worse (earlier for acrophase and below for nighttime sleep duration) than the mean change. For nighttime sleep duration, the “increasing” group was defined as >1 standard deviation above the mean change.

Abbreviations: HR, hazard ratio; CI, confidence interval.

**Supplementary Figure 5. Multivariable-adjusted* association of nighttime sleep duration with all-cause (A) and cardiovascular (B) mortality risk, stratified at mean visit 8 (baseline sleep visit) nighttime sleep duration.** HRs and 95% CIs were calculated using Cox proportional hazards models. The “decreasing” group was defined as >1 standard deviation below the mean change and the “increasing” group was defined as >1 standard deviation above the mean change. The p values for the interactions of each group with baseline nighttime sleep duration are as follows: “increasing”

*Two models are presented, an age-adjusted model and a fully adjusted model, which adjusted for age, education, body mass index, diabetes, hypertension, myocardial infarction, antidepressant use, functional impairments, self-rated health, and global cognition at visit nine.

Abbreviations: V8, visit 8; HR, hazard ratio; CI, confidence interval.
